# Supplementary material
Source: MDPI journal article supplement (https://www.mdpi.com/2673-9623/4/1/4)
Supplement: s1 [file s1]

## Supplementary Materials

### Hydroxyalkyl amination of agarose gels improves adsorption of bisphenol A and diclofenac from water: Conceivable prospects

Lennart Ljunggren<sup>1\*</sup>, Svetlana Ivanova<sup>1</sup>, Alexander E. Ivanov<sup>2</sup>

<sup>1</sup> Malmö University, Faculty of Health and Society, Department of Biomedical Science, SE-20506 Malmö, Sweden

<sup>2</sup> VitroSorb AB, Medeon Science Park, Per Albin Hanssons väg 41, SE-20512 Malmö, Sweden

\*Corresponding author, email: [lennart.ljunggren@mau.se](mailto:lennart.ljunggren@mau.se), Tel. +46 (0) 735126858

#### Calibration curves for bisphenol A estimation

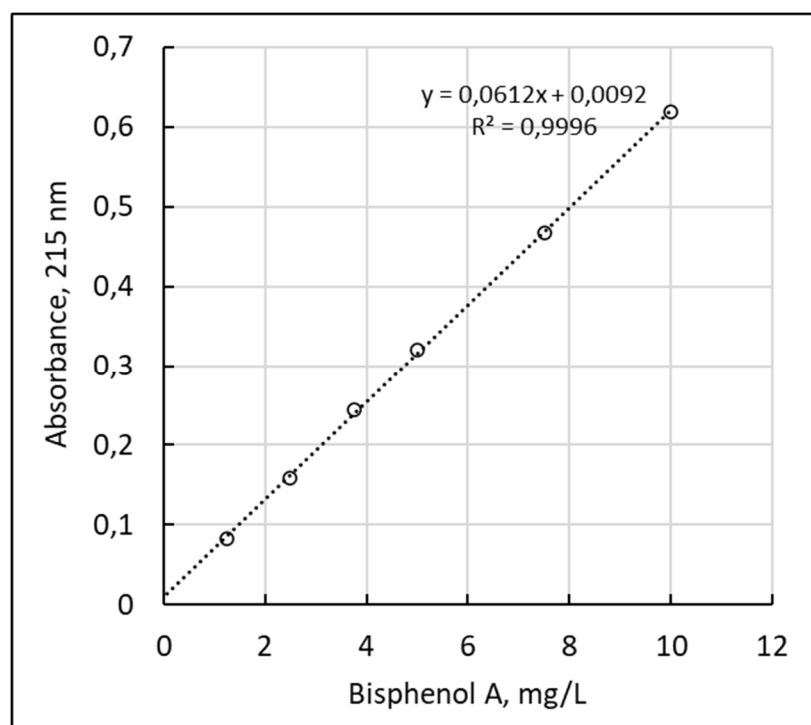

Fig.S1. Linear calibration for estimation of bisphenol A at concentrations below 10 mg/L.

Concentration of bisphenol A in the range from 1 to 10 mg/L was calculated from the linear calibration  $C_{BP} [mg/L] = (A_{215} - 0.009)/0.0612$  obtained for the pure substance, where  $A_{215}$  is absorbance of bisphenol A solution at 215 nm. The concentration of bisphenol A in the 10 to 100 mg/L range was calculated from the linear calibration,  $C_{BP} [mg/L] = (A_{276} + 0.001)/0.0139$ , obtained for the pure substance, where  $A_{276}$  is the absorbance of bisphenol A solution at  $\lambda_{max} = 276$  nm.

Since the absorbance of bisphenol A at low concentrations can be reproducibly measured at 215 nm with experimental error of  $\pm 0.001$ , the absorbance of 0.02 can be used for quantifying the substances at 5% relative experimental error. This absorbance corresponds to 0.18 mg/L bisphenol A, which may be considered as a sensitivity limit.

Table S1. Summary output obtained in Excel for the linear regression of Fig.S1

#### SUMMARY OUTPUT

| <i>Regression Statistics</i> |          |
|------------------------------|----------|
| Multiple R                   | 0,999793 |
| R Square                     | 0,999586 |
| Adjusted R Square            | 0,999483 |
| Standard Error               | 0,004537 |
| Observations                 | 6        |

As the standard error of the regression (0,0045) is measured in the units of dependent variable, i.e. the absorbance at 215 nm, the standard error of bisphenol estimation is then  $0,0045/0,0612 = 0,073$  mg/L.

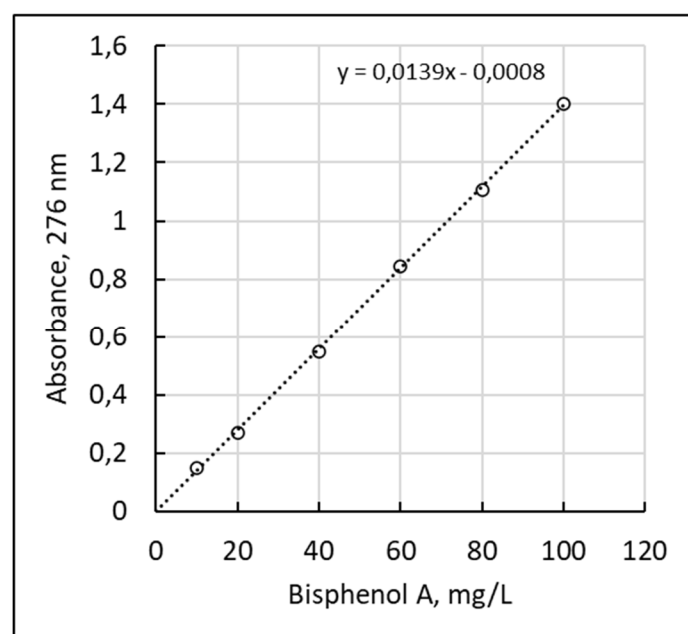

Fig.S2 Linear calibration for estimation of bisphenol A at concentrations above 10 mg/L.

#### Calibration curve for diclofenac estimation

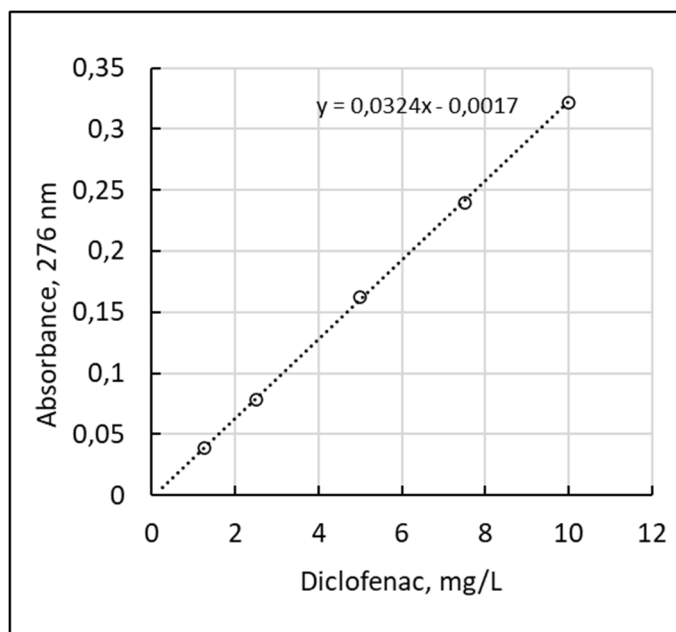

Fig.S3. Linear calibration for estimation of diclofenac.

The concentration of diclofenac in the effluent was calculated using the equation  $C_{DCF} \text{ (mg/L)} = (A_{276} + 0.002)/0.0324$  found from the linear calibration, see Fig.S2.

Since the absorbance of diclofenac at low concentrations can be reproducibly measured at 276 nm with experimental error of  $\pm 0.001$ , the absorbance of 0.02 can be used for quantifying the substance with 5% relative experimental error. This absorbance corresponds to 0.67 mg/L diclofenac, which may be considered as a sensitivity limit.

Table S2. Summary output obtained in Excel for the linear regression of Fig.S2

SUMMARY OUTPUT

| <i>Regression Statistics</i> |          |
|------------------------------|----------|
| Multiple R                   | 0,999943 |
| R Square                     | 0,999886 |
| Adjusted R Square            | 0,999848 |
| Standard Error               | 0,001429 |
| Observations                 | 5        |

As the standard error of the regression (0,0014) is measured in the units of dependent variable, i.e. the absorbance at 276 nm, the standard error of diclofenac estimation is then  $0,0014/0,0324 = 0.043 \text{ mg/L}$ .

**Table S3. Breakthrough curves of (a) bisphenol A (10 mg/L) obtained on 1 mL-column with TRIS-Zetarose 4FF (Fig.6a): Raw data.**

| V, mL | bpA   | bpA-2 |
|-------|-------|-------|
| 2     | 0,013 | 0,014 |
| 4     | 0,014 | 0,012 |
| 6     | 0,013 | 0,012 |
| 8     | 0,013 | 0,013 |
| 10    | 0,011 | 0,013 |
| 12    | 0,011 | 0,012 |
| 14    | 0,013 | 0,014 |
| 16    | 0,016 | 0,019 |
| 18    | 0,036 | 0,046 |
| 20    | 0,074 | 0,111 |
| 24    | 0,179 | 0,257 |
| 28    | 0,492 | 0,432 |
| 32    | 0,557 | 0,537 |
| 36    | 0,593 | 0,585 |
| 40    | 0,612 | 0,601 |
| 44    | 0,608 | 0,61  |
| 48    | 0,609 | 0,61  |
| 52    | 0,612 | 0,615 |
| 56    | 0,605 | 0,615 |
| 60    | 0,581 |       |
| 64    | 0,496 |       |
| 68    | 0,375 |       |
| 72    | 0,262 |       |
| 76    | 0,195 |       |
| 85    | 0,108 |       |
| 89    | 0,063 |       |
| 93    | 0,047 |       |
| 97    | 0,033 |       |
| 101   | 0,03  |       |
| 105   | 0,352 |       |
| 109   | 0,284 |       |
| 113   | 0,219 |       |
| 117   | 0,18  |       |
| 121   | 0,083 |       |
| 125   | 0,012 |       |
| 129   | 0,008 |       |
| 133   | 0,011 |       |
| 137   | 0,009 |       |
| 141   | 0,007 |       |

**Table S4. Breakthrough curves of diclofenac (10 mg/L) obtained on 1 mL-columns with TRIS-Zetarose 4FF and Zetarose 4FF (Fig.6b): Raw data**

| V, mL | diclof<br>Tris-<br>Zeta<br>4FF | Abs<br>10 mg/L<br>diclof | diclof<br>Zeta4FF |
|-------|--------------------------------|--------------------------|-------------------|
| 2     | 0,012                          | 0,319                    | 0,007             |
| 6     | 0,003                          |                          | 0,058             |
| 10    | 0,002                          |                          | 0,299             |
| 14    | 0,009                          |                          | 0,312             |
| 16    | 0,002                          |                          | 0,323             |
| 20    | 0,002                          |                          | 0,324             |
| 24    | 0,002                          |                          |                   |
| 28    | 0,002                          |                          |                   |
| 36    | 0,005                          |                          |                   |
| 40    | 0,004                          |                          |                   |
| 50    | 0,008                          |                          |                   |
| 64    | 0,025                          |                          |                   |
| 76    | 0,068                          |                          |                   |
| 80    | 0,1                            |                          |                   |
| 84    | 0,114                          |                          |                   |
| 88    | 0,115                          |                          |                   |
| 92    | 0,123                          |                          |                   |
| 96    | 0,129                          |                          |                   |
| 100   | 0,135                          |                          |                   |
| 104   | 0,138                          |                          |                   |
| 128   | 0,158                          |                          |                   |
| 132   | 0,161                          |                          |                   |
| 136   | 0,161                          |                          |                   |
| 170   | 0,165                          |                          |                   |
| 176   | 0,177                          |                          |                   |
| 182   | 0,175                          |                          |                   |
| 188   | 0,175                          |                          |                   |
| 194   | 0,177                          |                          |                   |
| 200   | 0,182                          |                          |                   |
| 206   | 0,183                          |                          |                   |
| 212   | 0,181                          |                          |                   |
| 218   | 0,18                           |                          |                   |
| 228   | 0,017                          |                          |                   |
| 239   | 0,01                           |                          |                   |
| 251   | 0,001                          |                          |                   |
| 259   | 0,72                           |                          |                   |

|     |       |       |
|-----|-------|-------|
| 263 | 0,085 |       |
| 267 | 0,04  |       |
| 271 | 0,022 |       |
| 275 | 0,062 |       |
| 279 | 0,037 |       |
| 283 | 0,021 |       |
| 287 | 0,011 |       |
| 291 | 0,001 |       |
| 295 | 0,001 |       |
| 299 | 0,001 | 0,319 |
| 303 | 0,001 |       |
| 307 | 0,001 |       |
| 311 | 0,001 |       |
| 321 | 0,001 |       |
| 331 | 0,001 |       |

Breakthrough curves of acetanilide and resorcinol registered on 1 mL-column with TRIS-Zetarose 4FF.

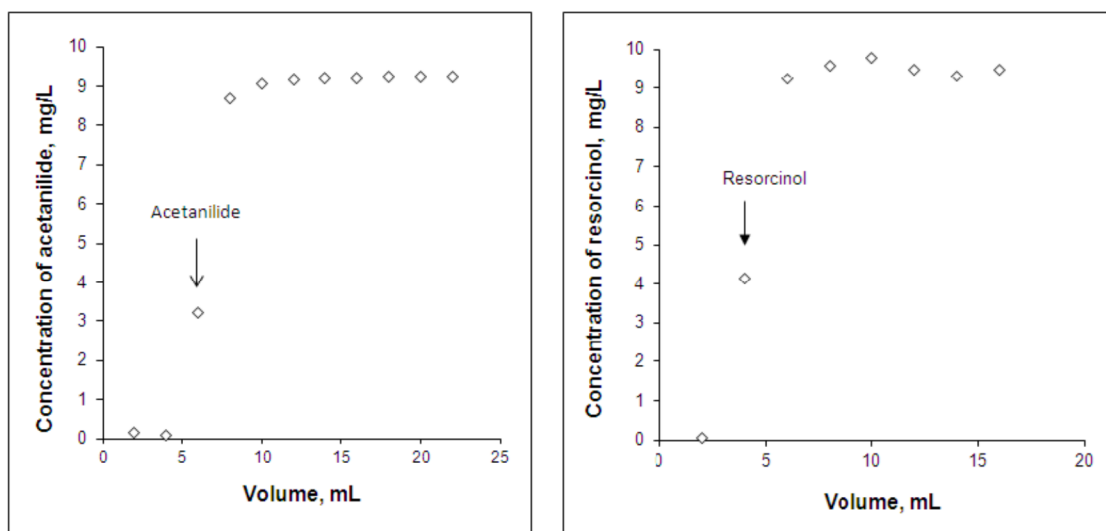

Fig.S4. Breakthrough curves of acetanilide (10 mg/L) and resorcinol (10 mg/L) applied to a 1 mL-column with Mono-Tris-Zetarose, flow rate 0.45 mL/min.
